# Supplementary material for: Environmental Justice Assessment of Fine Particles, Ozone, and Mercury over the Pearl River Delta Region, China
Source: MDPI journal article supplement (doi:10.3390/su141710891), 2022-08-31
Supplement: s1 [file s1]

Archive with 1 entries (1 files):
- sustainability-1736071-supplementary.pdf
